# Supplementary material
Source: PubMed Central journal article supplement (PMC8427502)
Supplement: jamadermatol-e213344-s001.pdf [file jamadermatol-e213344-s001.pdf]

## Supplemental Online Content

Zakine E, Schell B, Battistella M, et al. *UBA1* variations in neutrophilic dermatosis skin lesions of patients with VEXAS syndrome. *JAMA Dermatol*. Published online September 8, 2021. doi:10.1001/jamadermatol.2021.3344

**eTable.** Haematological features of patients

**eFigure.** Sanger profiles of the *UBA1* gene in bone marrow (BM) and skin lesion for two patients

This supplemental material has been provided by the authors to give readers additional information about their work.

**eTable. Haematological features of patients.**

| Patient Id | Hematological disorder | Bone marrow findings                                                                                                                                            | Vacuoles in BM precursors | Karyotype      | Somatic mutations in BM sample (allelic frequency in %) | Somatic mutations in skin infiltrate (allelic frequency in %) |
|------------|------------------------|-----------------------------------------------------------------------------------------------------------------------------------------------------------------|---------------------------|----------------|---------------------------------------------------------|---------------------------------------------------------------|
| Patient #1 | - MDS-MLD<br>- MM      | Dysgranulopoiesis (hypossegmentation, persistence of basophilia and toxic granules), dysmegakaryopoiesis (segmentation anomalies)                               | Present                   | NK             | No mutation                                             | Not documented                                                |
| Patient #2 | MDS-SLD                | Dysgranulopoiesis (anomalies of segmentation, chromatin condensation, Döhle bodies and toxic granules)                                                          | Present                   | Del(6q)        | ZRSR2 (75%), BRCA (38%), DNMT3A (33%)                   | ZRSR2 (12%), BRCA (12%), DNMT3A (4%)                          |
| Patient #3 | CCUS                   | Moderate dysgranulopoiesis (segmentation anomalies) and dyserythropoiesis (megaloblastic changes)                                                               | Present                   | NK             | Not documented                                          | No mutation                                                   |
| Patient #4 | - ET<br>- CCUS         | Dyserythropoiesis                                                                                                                                               | Present                   | -7             | DNMT3A (41%), CALR (1%)                                 | Not documented                                                |
| Patient #5 | MDS-MLD                | Dysgranulopoiesis (hypossegmentation, abnormal chromatin condensation, Döhle bodies and toxic granules), dysmegakaryopoiesis (multiple widely separated nuclei) | Present                   | -Y             | No mutation                                             | No mutation                                                   |
| Patient #6 | - MDS-MLD<br>- MGUS    | Dysgranulopoiesis (agranularity, hypossegmentation and Döhle bodies), dyserythropoiesis (multinuclearity) and dysmegakaryopoiesis (hypo-lobated nuclei)         | Present                   | NK             | No mutation                                             | Not documented                                                |
| Patient #7 | MDS-MLD                | Dysgranulopoiesis and dyserythropoiesis                                                                                                                         | Not documented            | Not documented | Not documented                                          | No mutation                                                   |

|            |        |                                                           |                |                |                |           |
|------------|--------|-----------------------------------------------------------|----------------|----------------|----------------|-----------|
| Patient #8 | MDS-EB | Dysgranulopoiesis and dyserythropoiesis with blast excess | Not documented | Not documented | Not documented | TP53 (3%) |
|------------|--------|-----------------------------------------------------------|----------------|----------------|----------------|-----------|

**eFigure. Sanger profiles of the *UBA1* gene in bone marrow (BM) and skin lesion for two patients.**

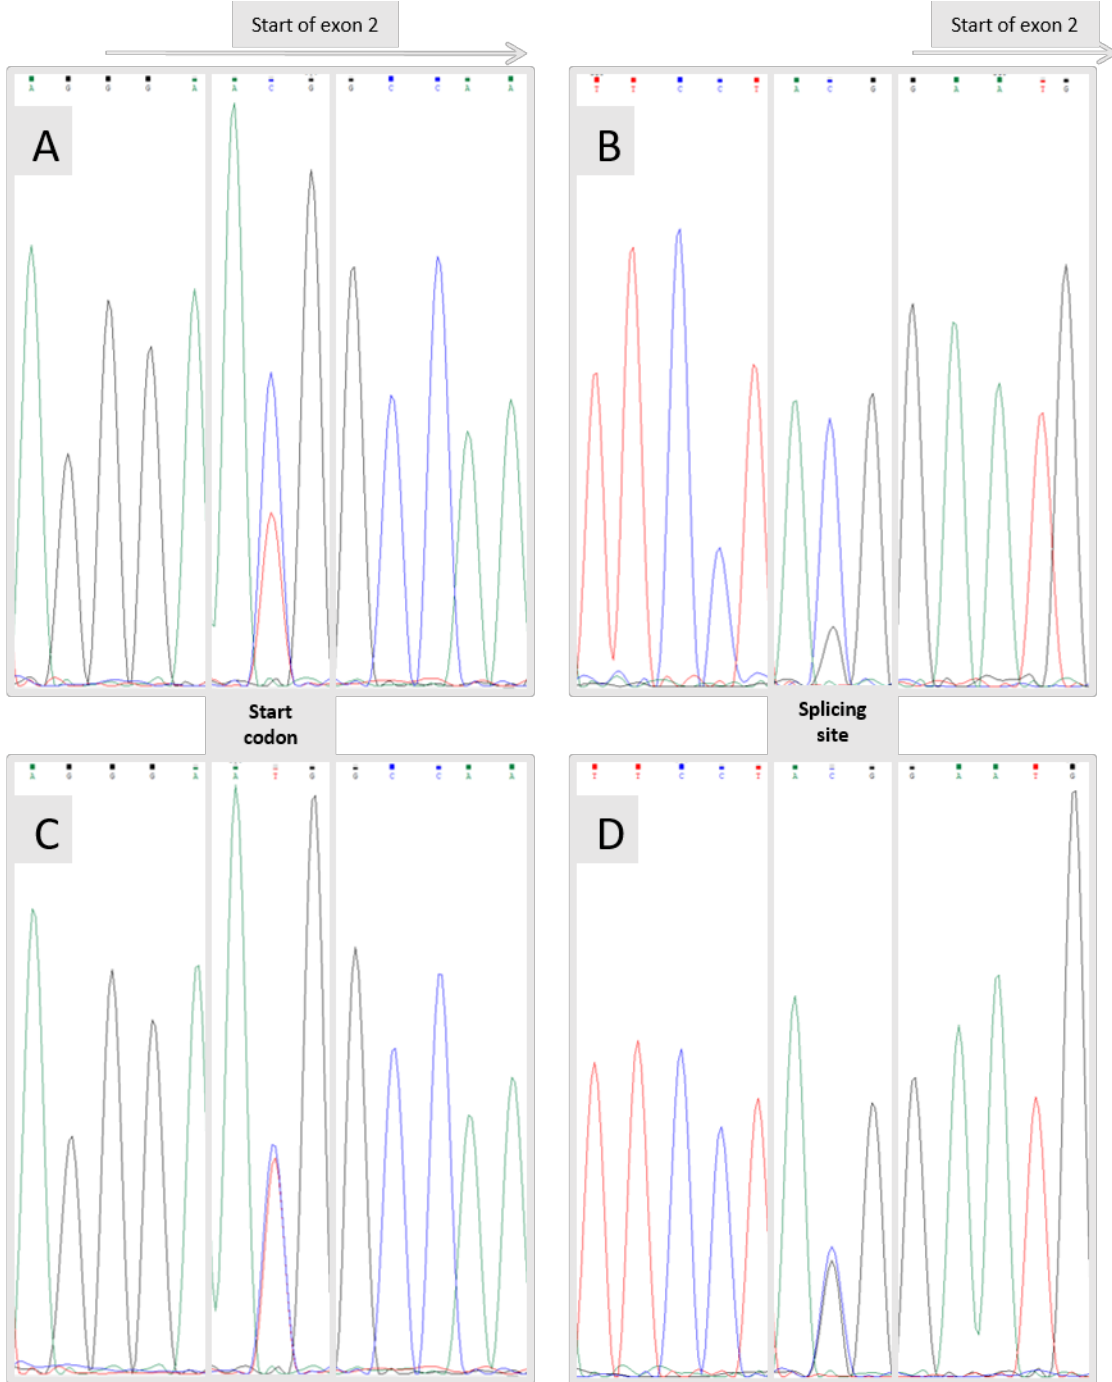

Patient #5: c.T122C mutation in the BM (Panel A) and in a skin lesion (Panel C)  
Patient #7: c.118-1G>C splice mutation observed in the BM (Panel B) and in a skin lesion (Panel D).  
The height of the mutated peak is proportional to the clonal infiltrate in the sample.
